# Supplementary material for: Mothers Living With Contamination Of Perfluoroalkyl Substances: An Assessment Of The Perceived Health Risk And Self-Reported Diseases
Source: Research Square preprint supplement (doi:10.21203/rs.3.rs-1323585/v1), 2022-03-07
Supplement: Supplementary file 1 [file df9db8be1e8491b9394beb93.docx]

**Supplementary material**

**Table S1.** The serum blood PFAS concentrations (PFOA, PFOS, and PFHxS) in the participants from the Red Zone.

|  | **N** | **Overall**, N = 148*1* | **Red Zone** | | **P-value***2* | |
| --- | --- | --- | --- | --- | --- | --- |
| **A**, N = 98*1* | **B**, N = 50*1* |
| **PFOA** (ng/mL) | 148 | 17 (8, 35) | 20 (12, 42) | 9 (6, 17) | <0.001 | |
| **PFOS** (ng/mL) | 146 | 3.10 (2.30, 4.20) | 3.50 (2.58, 4.62) | 2.55 (1.92, 3.27) | <0.001 | |
| **PFHxS (**ng/mL) | 145 | 2.20 (1.40, 3.40) | 2.75 (1.70, 4.38) | 1.40 (0.90, 2.40) | <0.001 | |
| *1*Median (IQR) or Frequency (%)  *2*Wilcoxon rank sum test | | | | | |

**Table S2.** The percentage of the total variance explained by predictors () in the regression model.

| **Predictors** | **Log-PFOA Model** | **Log-PFOS Model** | **Log-PFHxS Model** |
| --- | --- | --- | --- |
| Tap water habit | 3% | - | 4% |
| Residential time | 7% | 2% | 7% |
| Red Zone | 10% | 10% | 10% |
| Vegetables source | - | 8% | - |
| Meat source | 2% | - | - |
| Detached house | 2% | - | - |
| BMI | - | <1% | - |
| Breastfeeding 1st child | 17% | 5% | 5% |
| Breastfeeding 2nd child | 8% | 4% | 1% |
| Breastfeeding 3rd child | 2% | - | - |
| N. of abortions | - | 2% | - |
| N. children before 2008 | 4% | - | 3% |
| N. children after 2008 | - | <1% | 6% |
| Time since last pregnancy | 2% | 3% | - |
| Tap Water * Residential time | 2% | - | 2% |
| Tap Water * Red Zone | 1% | . | - |
| Red Zone * N. of abortions | - | 3% | - |
